# Supplementary material
Source: publisher site journal article supplement (https://www.dovepress.com/article/321917)

## Supplementary Figures

**Supplementary Figure 1.** The C-index of the nomogram for overall survival in the training cohort.


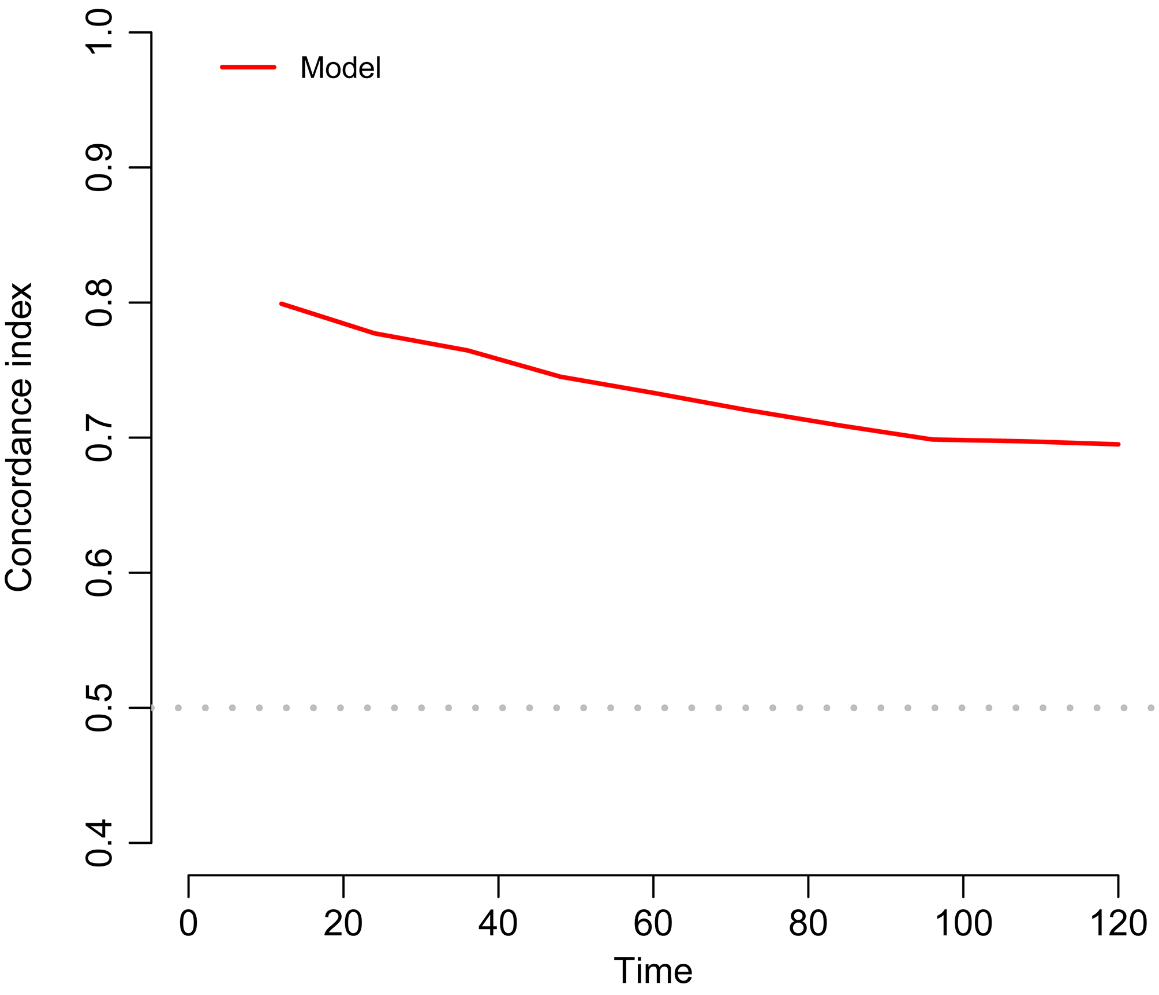

Supplement: Supplementary file 1 [file get_supplementary_file.php]
